# Supplementary material for: KLB gene polymorphism is associated with obesity and non-alcoholic fatty liver disease in the Han Chinese
Source: PubMed Central journal article supplement (PMC6781984; doi:10.18632/aging.102293), 2019-09-23

## SUPPLEMENTARY TABLE

Supplementary Table 1. Flow chart of the protocol for subject recruitment.

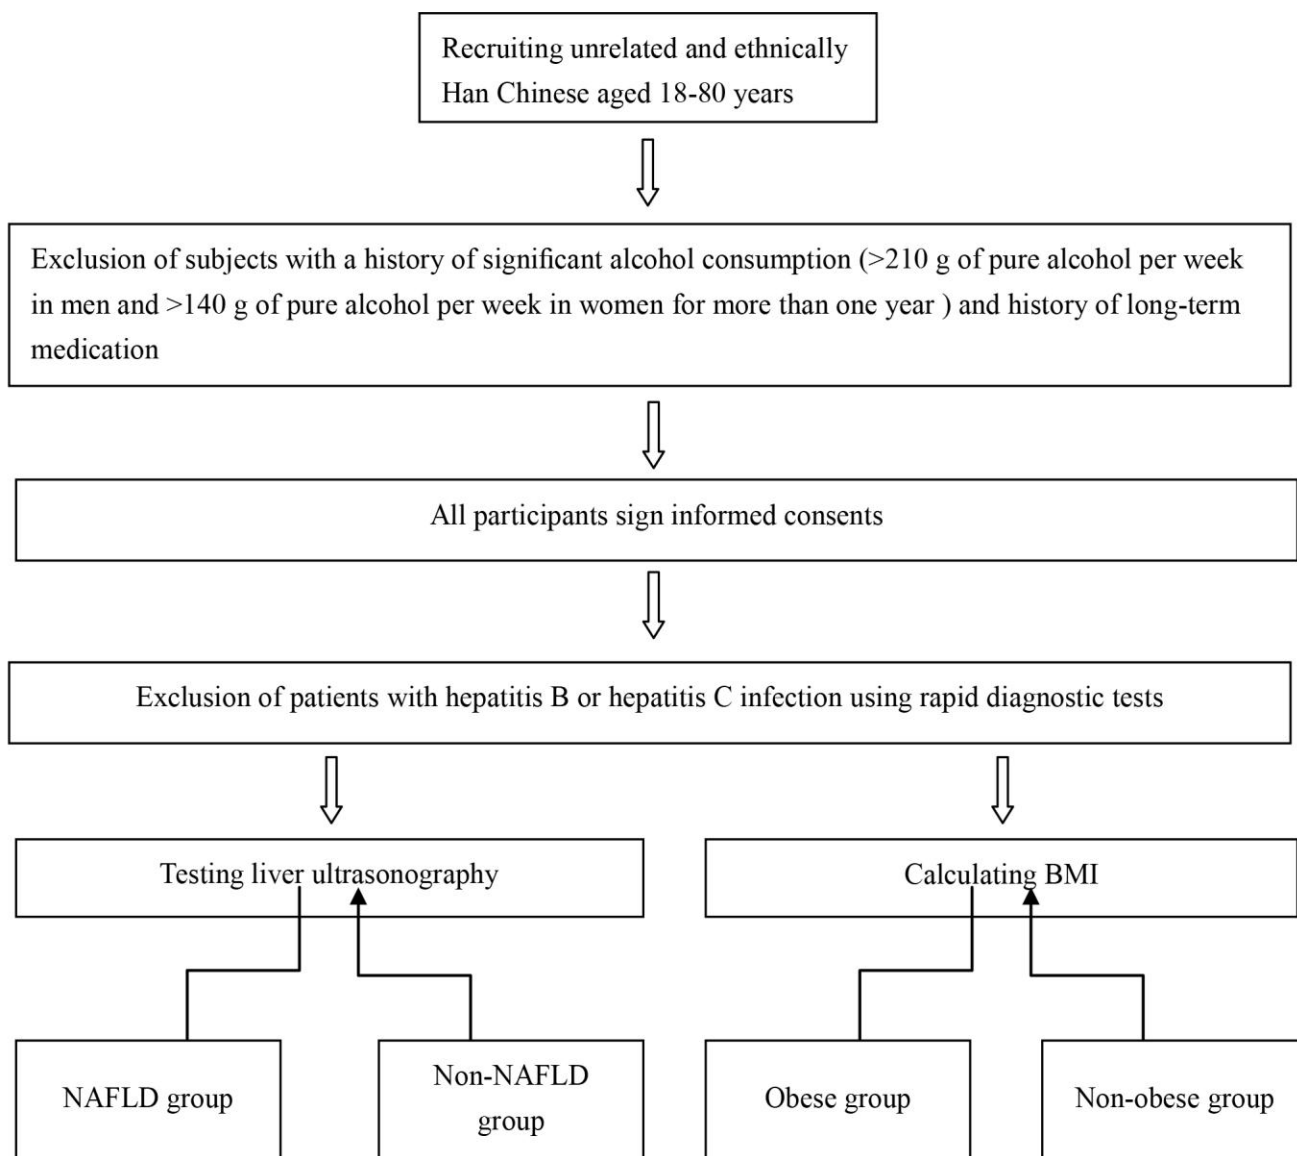

Supplement: aging-11-102293-s001.pdf [file aging-11-102293-s001.pdf]
